# Supplementary material for: Exploring the role of GS–GOGAT cycle in microcystin synthesis and regulation – a model based analysis
Source: Royal Society of Chemistry journal article supplement (doi:10.1039/c7mb00342k), 2017-10-05
Supplement: c7mb00342k1.pdf [file c7mb00342k1.pdf]

# 1 SUPPLEMENTARY TEXT S1

## 2 Exploring the role of GS-GOGAT cycle in microcystin 3 synthesis and regulation – a model based analysis

4 SWARNENDU BANERJEE, ABHISHEK SUBRAMANIAN, JOYDEV CHATTOPADHYAY, RAM  
5 RUP SARKAR

6

### 7 S1. Reactions considered in the model

8 The following reactions have been considered in the model:

9 **Table S1:** Reactions considered in the model

| Reactions                                                               | Reference |
|-------------------------------------------------------------------------|-----------|
| $glutamine + 2-OG \xrightarrow{v_{max1}^{GOGAT}} glutamate$             | 17        |
| $glutamate + NH_4^+ \xrightarrow{v_{max2}^{GS}} glutamine$              | 17        |
| $NH_4^+ + 2-OG \xrightarrow{v_{max3}^{GDH}} glutamate$                  | 17        |
| $NtcA + 2-OG \xrightleftharpoons[b_{aa}]{f_{aa}} NtcA^{(a)}$            | 21        |
| $NtcA^{(a)} + PipX \xrightleftharpoons[b_{ax}]{f_{ax}} NtcA^{(a)}-PipX$ | 23        |
| $P_{II} + PipX \xrightarrow{f_{px}} P_{II}-PipX$                        | 23        |
| $P_{II}-PipX \xrightarrow[2-OG]{b_{px}} P_{II} + PipX$                  | 23, 25    |
| $glutamate \xrightarrow[Mcy]{f_{mg}} Microcystin$                       | 6, 18     |

10

11

12

13

## 14 S2. Positive invariance

Let,  $X = ([NH_{4(ext)}^+], [Glu], [Gln], [2-OG], [NH_4^+], [NtcA], [NtcA^{(a)}], [PII], [PipX],$   
 15  $[NtcA^{(a)}-PipX], [PII-PipX], [Mcy], [MC])^T \in \mathbb{R}^{13}$  and  $F(X) = [F_1(X), F_2(X), F_3(X),$   
 $F_4(X), F_5(X), F_6(X), F_7(X), F_8(X), F_9(X), F_{10}(X), F_{11}(X), F_{12}(X), F_{13}(X)]$  with  
 16  $F : C_+ \rightarrow \mathbb{R}^{13}$  and  $F \in C^\infty(\mathbb{R}^{13})$ . Then the system of differential equations (7) becomes  
 17  $\dot{X} = F(X)$  where  $X(0) = X_0 \in \mathbb{R}_+^{13}$ . It is easy to check that  $F_i(X) | X_i = 0 \geq 0$  and hence any  
 18 solution of the above system with  $X_0 \in \mathbb{R}_+^{13}$ , say, is such that  $X(t) \in \mathbb{R}_+^{13}$  for all  $t > 0$ .

## 19 S3. Boundedness

20 *Theorem: All solutions of the system of differential equation (7) are uniformly bounded.*

21 Let,  $W_1 = [NH_{4(ext)}^+] + [Glu] + [Gln] + [2-OG] + [NH_4^+] + [NtcA^{(a)}] + [PII] + [NtcA^{(a)}-PipX]$   
 $+ [PII-PipX] + [Mcy] + [MC]$

22 Then taking time derivative and using the equation, we have,

$$23 \quad \frac{dW_1}{dt} \leq l_{w1} - V_{GS} - V_{GOGAT} - V_{GDH} + k_m \left( \frac{[NtcA^{(a)}]^3}{\theta_3 + [NtcA^{(a)}]^3} + \frac{[NtcA^{(a)}-PipX]^3}{\theta_4 + [NtcA^{(a)}-PipX]^3} \right) - d_{w1} W_1$$

24 where,  $d_{w1} = \min \{ d_N, d_{gl}, d_{gn}, d_{og}, d_n, d_{aa}, d_p, d_{ax}, d_{px}, d_m, d \}$

25 and  $l_{w1} = L + l_{nh} + l_{gl} + l_{gn} + l_{og} + l_p + l_{mcy}$

$$26 \quad \Rightarrow \frac{dW_1}{dt} \leq (l_{w1} + 2k_m) - d_{w1} W_1 \text{ since } k_m \left( \frac{[NtcA^{(a)}]^3}{\theta_3 + [NtcA^{(a)}]^3} \right) \leq k_m \text{ and so on.}$$

$$27 \quad \Rightarrow \frac{dW_1}{dt} + d_{w1} W_1 \leq \Omega_1 \text{ where, } \Omega_1 = l_{w1} + 2k_m$$

28 From the theory of differential inequalities,<sup>38</sup> we then obtain,

$$29 \quad 0 < W_1([NH_{4(ext)}^+], [Glu], [Gln], [2-OG], [NH_4^+], [NtcA^{(a)}], [PII], [NtcA^{(a)}-PipX], [PII-PipX],$$

$$[Mcy], [MC])$$

$$\begin{aligned}
& < \frac{\Omega_1}{d_{w1}} (1 - e^{-d_{w1}t}) + W_1 ([NH_4^{+}]_{4(ext)}(0), [Glu](0), [Gln](0), [2-OG](0), [NH_4^{+}](0), [NtcA^{(a)}](0), \\
& [PII](0), [NtcA^{(a)}-PipX](0), [PII-PipX](0), [Mcy](0), [MC](0)) e^{-d_{w1}t}
\end{aligned}$$

and for  $t \rightarrow \infty$ , it follows  $0 < W_1 < \frac{\Omega_1}{d_{w1}}$ , hence all solutions of

$$\begin{aligned}
& ([NH_4^{+}]_{4(ext)}(t), [Glu](t), [Gln](t), [2-OG](t), [NH_4^{+}](t), [NtcA^{(a)}](t), [PII](t), [NtcA^{(a)}-PipX](t), \\
& [PII-PipX](t), [Mcy](t), [MC](t)) \text{ that initiate at}
\end{aligned}$$

$$\begin{aligned}
& ([NH_4^{+}]_{4(ext)}(0), [Glu](0), [Gln](0), [2-OG](0), [NH_4^{+}](0), [NtcA^{(a)}](0), [PII](0), [NtcA^{(a)}-PipX](0), \\
& [PII-PipX](0), [Mcy](0), [MC](0))^T \in \mathbb{R}^{11} \text{ are confined to the region :}
\end{aligned}$$

$$\begin{aligned}
& G_1 = \{([NH_4^{+}]_{4(ext)}], [Glu], [Gln], [2-OG], [NH_4^{+}], [NtcA^{(a)}], [PII], [NtcA^{(a)}-PipX], [PII-PipX], \\
& [Mcy], [MC])^T \in \mathbb{R}^{11} : W_1 = \frac{\Omega_1}{d_{w1}} + \epsilon_1 \text{ for any } \epsilon_1 > 0\} \text{ for all } t \geq T^*, \text{ where } T^* \text{ depends on initial} \\
& \text{values } ([NH_4^{+}]_{4(ext)}(0), [Glu](0), [Gln](0), [2-OG](0), [NH_4^{+}](0), [NtcA^{(a)}](0), [PII](0), \\
& [NtcA^{(a)}-PipX](0), [PII-PipX](0), [Mcy](0), [MC](0))^T.
\end{aligned}$$

35

$$\text{Again let, } W_2 = [NtcA] + [PipX]$$

Then we have,

$$\frac{d[NtcA]}{dt} \leq l_a + 2k_a + b_{aa}[NtcA^{(a)}] - d_a[NtcA] \text{ and,}$$

$$\frac{d[PipX]}{dt} \leq l_x + b_{px}[2-OG] + b_{ax}[NtcA^{(a)}-PipX] - d_x[PipX]$$

$$\Rightarrow \frac{dW_2}{dt} \leq (l_a + l_x + 2k_a) + b_{px}[2-OG] + b_{aa}[NtcA^{(a)}] + b_{ax}[NtcA^{(a)}-PipX] - d_{w2}W_2$$

$$\text{where, } d_{w2} = \min\{d_a, d_x\}$$

$$\Rightarrow \frac{dW_2}{dt} + d_{w2}W_2 \leq \Omega_2$$

where,  $\Omega_2 = (l_a + l_x + 2k_a) + b_{px}[2-OG]^* + b_{aa}[NtcA^{(a)}]^* + b_{ax}[NtcA^{(a)}-PipX]^*$  and

$[NtcA^{(a)}] \leq [NtcA^{(a)}]^*$ ,  $[NtcA^{(a)}-PipX] \leq [NtcA^{(a)}-PipX]^*$  and  $[2-OG] \leq [2-OG]^*$  for all  $t \geq T^*$

Again from the theory of differential inequalities,<sup>38</sup> we then obtain,

$$0 < W_2([NtcA], [PipX]) < \frac{\Omega_2}{d_{w2}}(1 - e^{-d_{w2}t}) + W_2([NtcA](0), [PipX](0))e^{-d_{w2}t} \text{ and for } t \rightarrow \infty,$$

it follows  $0 < W_2 < \frac{\Omega_2}{d_{w2}}$ , hence all solution of  $([NtcA](t), [PipX](t))$  that initiate in

$([NtcA](0), [PipX](0))^T \in \mathbb{R}^2$  are confined to the region:  $G_2 = \{([NtcA], [PipX])^T \in \mathbb{R}^2 :$

$W_2 = \frac{\Omega_2}{d_{w2}} + \epsilon_2$  for any  $\epsilon_2 > 0\}$  for all  $t \geq T^{**}$ , where  $T^{**} > T^* > 0$  and  $T^{**}$  depends on the initial values  $([NtcA](0), [PipX](0))^T \in \mathbb{R}^2$

Thus all solutions of the set of differential equations are confined in the region  $G = G_1 \cup G_2 \in \mathbb{R}^{13}$  for all  $t > T^{**}$ .

#### S4. Data fitting

In order to fit to the data,<sup>28</sup> the simulated concentrations of microcystin (in  $\mu M$ ) have been converted to  $\mu g \text{ mm}^{-3}$ . Molar mass of Microcystin-LR is 995.174 g (CHEBI ID: 6925)<sup>39</sup> which implies that 1 g of Microcystin-LR is equivalent to 0.001 mol approximately. Now,  $1 \mu M = 10^{-6} \text{ mol L}^{-1} = 10^{-3} \times 10^{-6} \text{ g mm}^{-3} = 10^{-3} \mu g \text{ mm}^{-3}$ .

The result from the model  $M(t, \hat{k})$  is fitted into the data. If  $\epsilon$  be the error of the fit having independent Gaussian distribution having an unknown variance  $\sigma^2$ , we can write

$$y = M(t, \hat{k}) + \epsilon \text{ where, } \epsilon \sim N(0, I\sigma^2) \tag{S1}$$

61 Here,  $\hat{k} \in \mathbb{R}^n$  contains all the unknown parameters of the model and  $y$  contain N independent  
 62 observations  $y_{t_j}, j=1,2,...,N$ , from the data, where  $y_{t_j}$  represents the intracellular microcystin  
 63 content at different time points throughout the experiment.

64 An independent Gaussian prior specifications for  $\hat{k}$  is assumed

$$65 \quad k_i \sim N(\nu_i, \eta_i^2) \text{ where, } i=1,2,..n \quad (S2)$$

66 Gamma distribution in the following form is assumed as a prior for the inverse of error variance:

$$67 \quad p(\sigma^{-2}) \sim \Gamma\left(\frac{n_0}{2}, \frac{n_0}{2} S_0^2\right), \quad (S3)$$

68 where  $n_0$  and  $S_0^2$  is interpreted as prior mean and prior accuracy of  $\sigma^2$  respectively. The sum of  
 69 square function,  $SS(\hat{k})$  is defined as :

$$70 \quad \sum_{i=1}^N (y_{t_i} - M(t_i; \hat{k}))^2 \quad (S4)$$

71 Using conditional conjugacy property of gamma distribution, the conditional distribution  
 72  $p(\sigma^{-2} | y, \hat{k})$  is also a Gamma distribution:

$$73 \quad p(\sigma^{-2} | y, \hat{k}) = \Gamma\left(\frac{n_0 + N}{2}, \frac{n_0 S_0^2 + SS(\hat{k})}{2}\right) \quad (S5)$$

74 The conditional conjugacy property makes it possible to sample and update  $\sigma^2$  within each  
 75 Metropolis-Hastings simulation step for the other parameters. As independent Gaussian prior  
 76 distribution is assumed for  $\hat{k}$ , then the prior sum of squares for the given  $\hat{k}$  can be calculated  
 77 according to

$$78 \quad SS_{pri}(\hat{k}) = \sum_{i=1}^n \left[ \frac{k_i - \nu_i}{\eta_i} \right]^2. \quad (S6)$$

79 Then assuming that  $\sigma^2$  has a fixed value, the posterior distribution for  $\hat{k}$  can be expressed as  
 80 follows:

$$p(\hat{k} | y, \sigma^2) \propto \exp \left\{ -\frac{1}{2} \left( \frac{SS(\hat{k})}{\sigma^2} + SS_{pri}(\hat{k}) \right) \right\} \quad (S7)$$

and the posterior ratio needed in the Metropolis-Hastings acceptance probability can be written as:

$$\frac{p(\hat{k}^2 | y, \sigma^2)}{p(\hat{k}^1 | y, \sigma^2)} = \exp \left\{ -\frac{1}{2} \left( \frac{SS(\hat{k}^2)}{\sigma^2} - \frac{SS(\hat{k}^1)}{\sigma^2} \right) + \frac{1}{2} \left( SS_{pri}(\hat{k}^2) - SS_{pri}(\hat{k}^1) \right) \right\} \quad (S8)$$

The Delayed Rejection Adaptive Metropolis algorithm (DRAM)<sup>29, 30</sup> was used to generate posterior distributions of the parameters with an initial burn in period of 200000 simulations. The mean of MCMC chain after 200000 iterations was calculated for each of the parameters and used as point estimates for the unknowns. The algorithm was implemented using the MCMC toolbox<sup>31</sup> (written by Marko Laine) in MATLAB R2012a. Geweke's Z-scores<sup>40</sup> were used to ensure convergence of the MCMC chains.

**Table S2:** Geweke Z-scores for each of the parameters

| Parameters      | Geweke Z-scores |
|-----------------|-----------------|
| $k_m$ (batch 1) | 0.99            |
| $k_m$ (batch 2) | 0.97            |
| $f_{mg}$        | 0.97            |
| $k_3$           | 0.96            |
| $l_{mcy}$       | 0.95            |
| $l_{gl}$        | 0.99            |
| $d_{gl}$        | 0.97            |
| $d_m$           | 0.97            |
| $d$             | 0.98            |

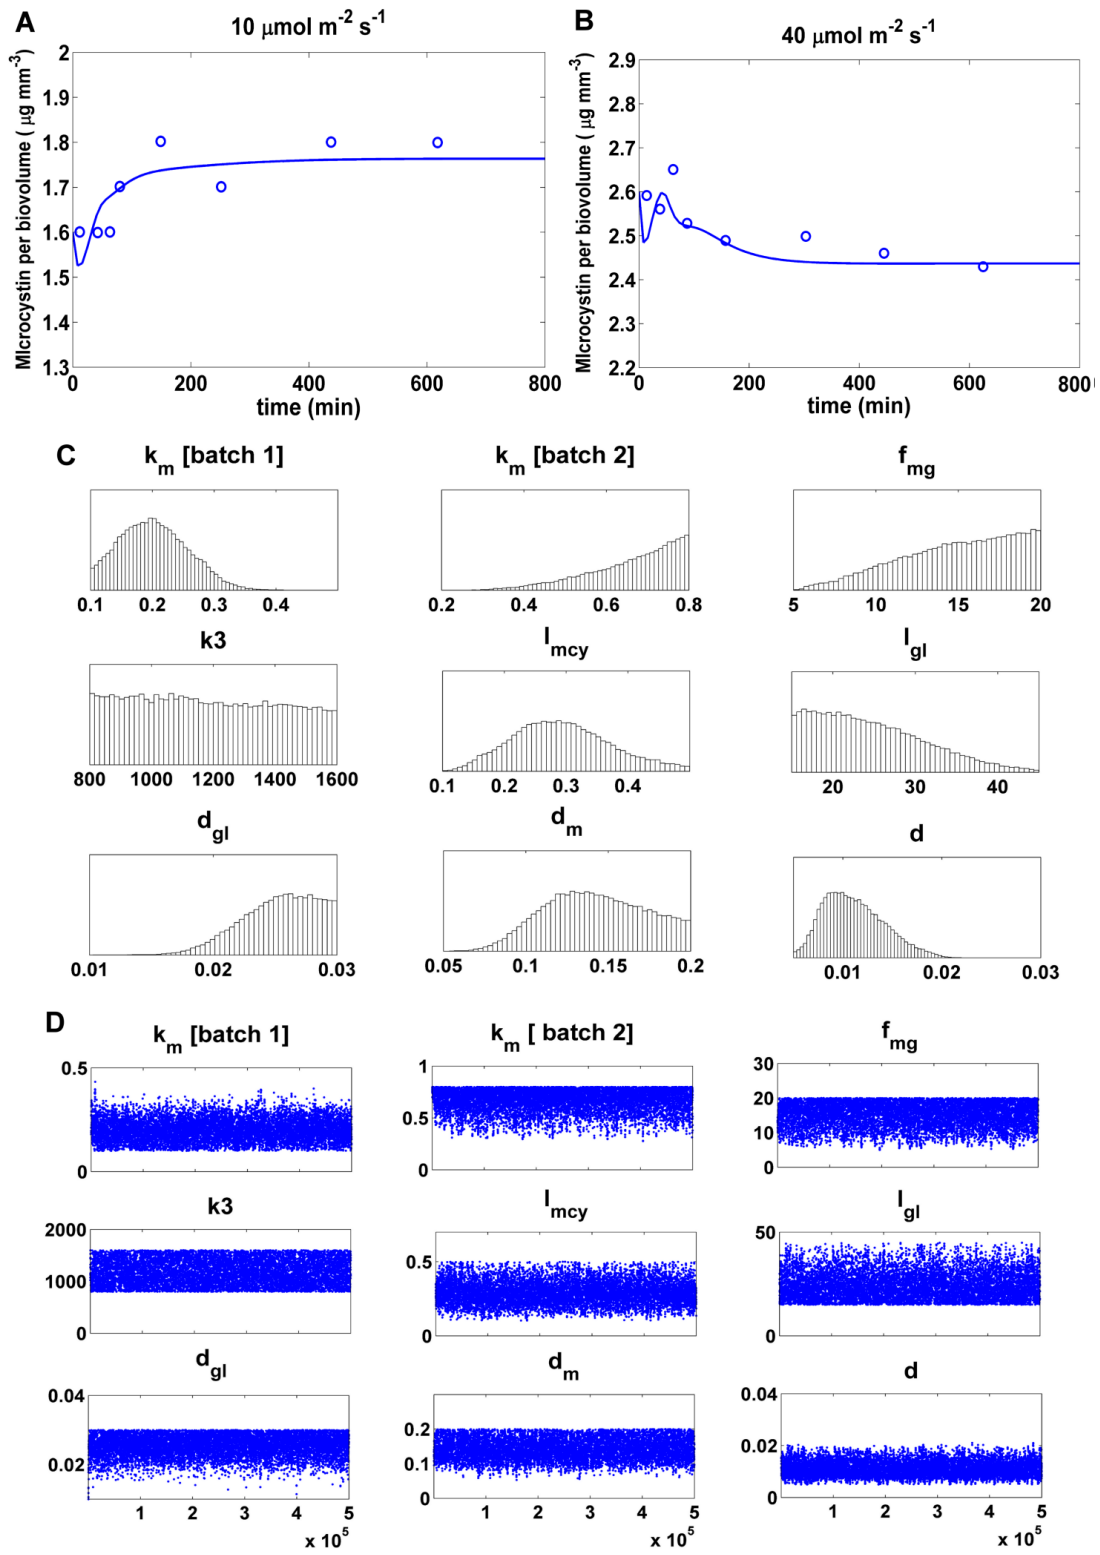

**Fig S1: (A and B):** Temporal plot of intracellular microcystin with the point estimate (mean of posterior distribution) for each of the parameters. Circles (o) represent real data obtained from <sup>28</sup>. **(C)** The marginal distributions of all estimated parameters. **(D)** Parameter trace plots of MCMC sampling demonstrating chain convergence

99 **S5. Parameters and initial values**

100 The parameters and initial values listed in Table S3 and S4 respectively have been used for all  
 101 simulations unless mentioned otherwise:

102 **Table S3:** Parameters description and values used for simulaton

| <i>Parameters</i> | <i>Description</i>                                                                                           | <i>Unit</i>              | <i>Value</i> | <i>Literature</i>                                             | <i>Reference</i> |
|-------------------|--------------------------------------------------------------------------------------------------------------|--------------------------|--------------|---------------------------------------------------------------|------------------|
| $v_{max1}$        | Maximal rate of GOGAT activity                                                                               | $\mu M \text{ min}^{-1}$ | 326          | 326 U/mL<br>1 U=1 nM/min<br>is assumed                        | 41               |
| $K_{gn}$          | Equilibrium dissociation constant for the dissociation of Gln from the ternary enzyme substrate complex      | $\mu M$                  | 173          | 0.173 mM                                                      | 41               |
| $K_{2-og}$        | Equilibrium dissociation constant for the dissociation of 2-OG from the ternary enzyme substrate complex     | $\mu M$                  | 10           | 10 $\mu M$                                                    | 41               |
| $K_{i(gn)}$       | Equilibrium dissociation constant for the dissociation of Gln from the binary enzyme substrate complex       | $\mu M$                  | 104          | 0.104 mM                                                      | 41               |
| $v_{max2}$        | Maximal rate of GS activity                                                                                  | $\mu M \text{ min}^{-1}$ | 150          |                                                               | Assumed          |
| $K_{nh}$          | Equilibrium dissociation constant for the dissociation of $NH_4^+$ from the ternary enzyme substrate complex | $\mu M$                  | 60           | 0.06 mM                                                       | 42               |
| $K_{gl}$          | Equilibrium dissociation constant for the dissociation of Glu from the ternary enzyme substrate complex      | $\mu M$                  | 4500         | 4.5 mM                                                        | 42               |
| $K_{i(gl)}$       | Equilibrium dissociation constant for the dissociation of Glu from the binary enzyme substrate complex       | $\mu M$                  | 37200*       | Calculated                                                    | 42               |
| $v_{max3}$        | Maximal rate of GDH activity                                                                                 | $\mu M \text{ min}^{-1}$ | 55           | Alternative pathway and hence considered less than $v_{max2}$ | Assumed          |
| $K''_{nh}$        | Equilibrium dissociation constant for the dissociation of $NH_4^+$ from the ternary enzyme substrate complex | $\mu M$                  | 5800         | 5.8 mM                                                        | 43               |



|                 |                                                                                                          |                       |          |                                                                  |                        |
|-----------------|----------------------------------------------------------------------------------------------------------|-----------------------|----------|------------------------------------------------------------------|------------------------|
| $K''_{2-og}$    | Equilibrium dissociation constant for the dissociation of 2-OG from the ternary enzyme substrate complex | $\mu M$               | 260      | $260 \mu M$                                                      | 43                     |
| $K''_{i(2-og)}$ | Equilibrium dissociation constant for the dissociation of 2-OG from the binary enzyme substrate complex  | $\mu M$               | 720      | $720 \mu M$                                                      | 43                     |
| $f_{ax}$        | Rate constant of formation of NtcA-PipX complex                                                          | $\mu M^{-1} min^{-1}$ | 0.1      | $K_d$ for NtcA-PipX binding<br>$85 nM$                           | 44                     |
| $b_{ax}$        | Rate constant of dissociation of NtcA-PipX complex                                                       | $min^{-1}$            | 0.0085   |                                                                  | 44                     |
| $f_{px}$        | Rate constant of formation of PII-PipX complex                                                           | $\mu M^{-1} min^{-1}$ | 0.0001** | $K_d$ for PII-PipX binding $\sim 7 \mu M$ in the absence of 2-OG | 23, 44                 |
| $l_a$           | Basal production rate of NtcA                                                                            | $\mu M min^{-1}$      | 0.39     |                                                                  | Assumed <sup>#</sup>   |
| $d_a$           | Natural degradation of NtcA                                                                              | $min^{-1}$            | 0.2      |                                                                  |                        |
| $l_p$           | Basal production rate of PII                                                                             | $\mu M min^{-1}$      | 0.25     |                                                                  |                        |
| $d_p$           | Natural degradation of PII                                                                               | $min^{-1}$            | 0.2      |                                                                  |                        |
| $l_x$           | Basal production rate of PipX                                                                            | $\mu M min^{-1}$      | 0.08     |                                                                  |                        |
| $d_x$           | Natural degradation of PipX                                                                              | $min^{-1}$            | 0.1      |                                                                  |                        |
| $d_{px}$        | Natural degradation of PII-PipX complex                                                                  | $min^{-1}$            | 0.005    |                                                                  |                        |
| $f_{aa}$        | Rate constant of formation of NtcA-2OG complex                                                           | $\mu M^{-1} min^{-1}$ | 0.0001   |                                                                  | Assumed                |
| $b_{aa}$        | Rate constant of dissociation of NtcA-2OG complex                                                        | $min^{-1}$            | 0.008    |                                                                  | Assumed                |
| $d_{aa}$        | Natural degradation of NtcA-2OG complex                                                                  | $min^{-1}$            | 0.2      |                                                                  | Assumed <sup>#</sup>   |
| $l_{nh}$        | Rate of internal ammonium ion influx from other intracellular sources                                    | $\mu M min^{-1}$      | 0.06     |                                                                  | Assumed <sup>###</sup> |
| $l_{og}$        | Rate of 2-OG influx from TCA cycle                                                                       | $\mu M min^{-1}$      | 53       |                                                                  |                        |
| $d_{og}$        | Depletion of 2-OG due to consumption in other reactions                                                  | $min^{-1}$            | 0.12     |                                                                  |                        |

|            |                                                                                                           |                  |                                      |                                                                  |                       |
|------------|-----------------------------------------------------------------------------------------------------------|------------------|--------------------------------------|------------------------------------------------------------------|-----------------------|
| $d_n$      | Natural depletion of intracellular ammonium ion or consumption into other reactions                       | $min^{-1}$       | 0.23                                 |                                                                  | Assumed <sup>##</sup> |
| $b_{px}$   | Rate constant of 2-OG dependent dissociation of PII-PipX                                                  | $min^{-1}$       | 0.001**                              | $K_d$ for PII-PipX binding $\sim 7 \mu M$ in the absence of 2-OG | 23, 44                |
| $k_4$      | Half saturation constant of 2-OG dependent PII-PipX dissociation                                          | $\mu M$          | 0.5                                  |                                                                  | Assumed               |
| $k_a$      | Maximal rate of synthesis of NtcA                                                                         | $\mu M min^{-1}$ | 0.17                                 |                                                                  | Assumed               |
| $\theta_1$ | Half saturation constant for synthesis of NtcA due to NtcA <sup>(a)</sup>                                 | $\mu M^2$        | 0.42                                 | Assumed to be less than $\theta_3$                               | Assumed               |
| $\theta_2$ | Half saturation constant for synthesis of NtcA due to NtcA <sup>(a)</sup> -PipX                           | $\mu M^2$        | 0.11                                 | Assumed to be less than $\theta_1$                               | Assumed               |
| $c_{ax}$   | rate constant of nitrogen uptake under the influence of NtcA <sup>(a)</sup> and NtcA <sup>(a)</sup> -PipX | $min^{-1}$       | 12.57                                |                                                                  | Assumed               |
| $k_1$      | Half saturation constant of nitrogen uptake due to NtcA <sup>(a)</sup>                                    | $\mu M$          | 30                                   | $k_1$ assumed greater than $k_2$                                 | Assumed               |
| $k_2$      | Half saturation constant of nitrogen uptake due to NtcA <sup>(a)</sup> -PipX                              | $\mu M$          | 7                                    | $k_m$ for uptake of ammonium = $7 \mu M$                         | 27                    |
| $k_m$      | Maximal rate of synthesis of Mcy protein                                                                  | $\mu M min^{-1}$ | 0.2030 (batch 1)<br>0.6632 (batch 2) |                                                                  | Estimated             |
| $\theta_3$ | Half saturation constant for synthesis of Mcy due to NtcA <sup>(a)</sup>                                  | $\mu M^3$        | 0.625***                             | $K_d$ for NtcA-mcy (in presence of 2-OG) = $0.625 \mu M$         | 14                    |
| $\theta_4$ | Half saturation constant for synthesis of Mcy due to NtcA <sup>(a)</sup> -PipX                            | $\mu M^3$        | 0.325                                | Assumed to be less than $\theta_3$                               | Assumed               |
| $d_m$      | Natural degradation of Mcy protein                                                                        | $min^{-1}$       | 0.1425                               |                                                                  | Estimated             |
| $f_{mg}$   | Rate constant of intracellular microcystin production                                                     | $min^{-1}$       | 14.8675                              |                                                                  | Estimated             |
| $k_3$      | Half saturation constant of intracellular microcystin production                                          | $\mu M$          | 1183.7                               |                                                                  | Estimated             |

|           |                                                                                                          |                        |         |  |                         |
|-----------|----------------------------------------------------------------------------------------------------------|------------------------|---------|--|-------------------------|
| $d$       | depletion of intracellular microcystin due natural degradation or transport to extracellular environment | $\text{min}^{-1}$      | 0.0111  |  | Estimated               |
| $l_{mcy}$ | Basal production rate of Mcy                                                                             | $\mu\text{M min}^{-1}$ | 0.2931  |  | Estimated               |
| $L$       | Rate of formation of external nitrogen in the growing medium                                             | $\mu\text{M min}^{-1}$ | 250     |  | Assumed <sup>###</sup>  |
| $d_N$     | natural depletion of the external nitrogen                                                               | $\text{min}^{-1}$      | 0.9     |  | Assumed <sup>###</sup>  |
| $d_{ax}$  | Natural degradation of NtcA-PipX complex                                                                 | $\text{min}^{-1}$      | 0.01    |  | Assumed <sup>#</sup>    |
| $l_{gl}$  | Rate of glutamate influx from other intracellular sources                                                | $\mu\text{M min}^{-1}$ | 24.6664 |  | Estimated               |
| $l_{gn}$  | Rate of glutamine influx from other intracellular sources                                                | $\mu\text{M min}^{-1}$ | 16      |  | Assumed <sup>####</sup> |
| $d_{gl}$  | depletion of glutamate into other reactions                                                              | $\text{min}^{-1}$      | 0.0253  |  | Estimated               |
| $d_{gn}$  | depletion of glutamine into other reactions                                                              | $\text{min}^{-1}$      | 0.08    |  | Assumed <sup>####</sup> |

103

104 Dry mass of *Microcystis aeruginosa* was reported to be  $438.4 \text{ fg } \mu\text{m}^{-3}$ <sup>32</sup> and the protein content was assumed  
105 to be 30% of the dry biomass<sup>33</sup> which is approximately  $130 \text{ fg } \mu\text{m}^{-3}$  ( $130 \times 10^3 \text{ mg/L}$ ). Hence, it can be  
106 assumed that 1 mg of protein to be equivalent to  $1/(130 \times 10^3) \text{ L}$  of volume within a cyanobacterium cell.  
107 Hence 1 nmoles/mg of protein  $\sim 130 \times 10^3 \text{ nmoles/L} = 130 \times 10^3 \text{ nM} = 130 \mu\text{M}$ .

108 \* For fixed glutamate concentration approximately 3 mM, a value of  $K_{NH_4^+} = 0.3216 \text{ mM}$  very close to the  
109 average of the two fitted value of  $K_{NH_4^+}$  is assumed, and  $K_{i(gl)}$  is calculated using the formula

110 
$$K_{NH_4^+} = \frac{K_{nh}(K_{i(gl)} + [Glu])}{K_{gl} + [Glu]}$$
<sup>45</sup>

111 \*\* As 2-oxoglutarate assists in PipX dissociation from PII, the  $K_d$  value in presence of 2-OG, is assumed to  
112 be  $10 \mu\text{M}$ . Further, it was assumed,  $b_{px} / f_{px} = 10 \mu\text{M}$ .

113 \*\*\*  $\theta_3$  is assumed equal to  $K_d$  for NtcA-mcy binding.

114 # The intracellular concentration of signalling proteins/transcription factors can range between 10 nM – 1  
115  $\mu\text{M}$ .<sup>46</sup> The formation and degradation rates of the proteins and complexes have been assumed so that the  
116 intracellular concentration is always of the order of 1  $\mu\text{M}$ .

117 ## The  $k_m$  for glutamine synthetase ranges from 20-170  $\mu\text{M}$  for ammonium<sup>17</sup> and intracellular 2-oxoglutarate  
118 concentration ranges from 60-440  $\mu\text{M}$ .<sup>16</sup> The formation and depletion rate of 2-OG and ammonium in our

119 model were so assumed that simulations yielded an intracellular concentration of around 50  $\mu\text{M}$  and 300  $\mu\text{M}$   
 120 for nitrogen and 2-oxoglutarate respectively.

121 ### Surface water may contain ammonium upto 12 mg/litre.<sup>47</sup> Molar mass of ammonium is 18g (CHEBI)<sup>39</sup>.  
 122 Hence, 1g can be written as  $1/18 \text{ mol} = 1/18 \times 10^6 \mu\text{mol}$ . Thus  $12 \text{ mg/litre} = 12 \times 10^{-3} \text{ g/litre} = 0.66667 \times 10^3$   
 123  $\mu\text{mol/litre} = 666.67 \mu\text{M}$ . Our simulation results only reach a value of 250  $\mu\text{M}$  for excess ammonium  
 124 condition which is well within the reported value. Also, we used  $L=1\mu\text{M}$  to produce nitrogen starved  
 125 condition and the aim was to observe the system behaviour under very almost no available nitrogen.

126 ##### Muro-Pastor et al.<sup>15</sup> in their study have measured the intracellular concentration of glutamine in  
 127 cyanobacteria to be 0-85 nmoles/mg protein. This can be scaled using dry mass of *Microcystis aeruginosa*  
 128 and the protein content (detailed description shown below) to be approximately 0-11050  $\mu\text{M}$ . In our  
 129 simulation, the glutamine formation rate and depletion rate have been assumed such that all our simulations  
 130 lead to intracellular glutamine concentration which is well within the reported range.

131 **Table S4:** Symbols representing all state variables and their initial values used for simulations

| <i>Variables</i>          | <i>Symbols</i>                    | <i>Initial values</i>            | <i>Reference</i> |
|---------------------------|-----------------------------------|----------------------------------|------------------|
| External ammonium ion     | $[\text{NH}_4^+_{(\text{ext})}]$  | 10000                            | assumed          |
| Glutamate                 | [Glu]                             | 600                              | 15               |
| Glutamine                 | [Gln]                             | 11000                            | 15               |
| 2-oxoglutarate            | [2-OG]                            | 10                               | assumed          |
| Internal ammonium ion     | $[\text{NH}_4^+]$                 | 200                              | assumed          |
| NtcA                      | [NtcA]                            | 0.2                              | assumed          |
| PII                       | [PII]                             | 2                                | assumed          |
| PipX                      | [PipX]                            | 0.25                             | assumed          |
| NtcA-2-OG complex         | $[\text{NtcA}^{(a)}]$             | 0.05                             | assumed          |
| NtcA-2-OG-PipX<br>complex | $[\text{NtcA}^{(a)}\text{-PipX}]$ | 1                                | assumed          |
| PII-PipX complex          | [PII-PipX]                        | 1                                | assumed          |
| Mcy enzyme                | [Mcy]                             | 0.1                              | assumed          |
| Microcystin               | [MC]                              | 1600 (batch 1)<br>2600 (batch 2) | 28               |

132 \*All the initial values are taken in  $\mu\text{M}$

133

134

## 135 S6. Equilibrium points and Stability analysis

136 The interior equilibrium point  $X^* \in \mathbb{R}_+^{13}$  for the system can be calculated by using the following  
 137 set of algebraic equations:

$$138 \quad L - c_{ax} \left( \frac{[NtcA^{(a)}]}{k_1 + [NH_4^{+}(ext)]} + \frac{[NtcA^{(a)} - PipX]}{k_2 + [NH_4^{+}(ext)]} \right) [NH_4^{+}(ext)] - d_N [NH_4^{+}(ext)] = 0$$

$$139 \quad l_{gl} + V_{GOGAT} - V_{GS} + V_{GDH} - f_{mg} \frac{[Mcy][Glu]}{k_3 + [Glu]} - d_{gl} [Glu] = 0$$

$$140 \quad l_{gn} + V_{GS} - V_{GOGAT} - d_{gn} [Gln] = 0$$

$$141 \quad l_{og} - V_{GOGAT} - V_{GDH} - f_{aa} [NtcA] [2-OG] + b_{aa} [NtcA^{(a)}] - d_{og} [2-OG] = 0$$

$$142 \quad l_{nh} - V_{GS} - V_{GDH} + c_{ax} \left( \frac{[NtcA^{(a)}]}{k_1 + [NH_4^{+}(ext)]} + \frac{[NtcA^{(a)} - PipX]}{k_2 + [NH_4^{+}(ext)]} \right) [NH_4^{+}(ext)] - d_n [NH_4^{+}] = 0$$

$$143 \quad l_a + k_a \left( \frac{[NtcA^{(a)}]^2}{\theta_1 + [NtcA^{(a)}]^2} + \frac{[NtcA^{(a)} - PipX]^2}{\theta_2 + [NtcA^{(a)} - PipX]^2} \right) - f_{aa} [NtcA] [2-OG] + b_{aa} [NtcA^{(a)}] - d_a [NtcA] = 0$$

$$144 \quad f_{aa} [NtcA] [2-OG] - b_{aa} [NtcA^{(a)}] - f_{ax} [NtcA^{(a)}] [PipX] + b_{ax} [NtcA^{(a)} - PipX] - d_{aa} [NtcA^{(a)}] = 0$$

$$145 \quad l_p - f_{px} [PII] [PipX] + \frac{b_{px} [2-OG] [PII - PipX]}{k_4 + [PII - PipX]} - d_p [PII] = 0$$

$$146 \quad l_x - f_{px} [PII] [PipX] - f_{ax} [NtcA^{(a)}] [PipX] + \frac{b_{px} [2-OG] [PII - PipX]}{k_4 + [PII - PipX]} + b_{ax} [NtcA^{(a)} - PipX] - d_x [PipX] = 0$$

$$147 \quad f_{ax} [NtcA^{(a)}] [PipX] - (b_{ax} + d_{ax}) [NtcA^{(a)} - PipX] = 0$$

$$148 \quad f_{px} [PII] [PipX] - \frac{b_{px} [2-OG] [PII - PipX]}{k_4 + [PII - PipX]} - d_{px} [PII - PipX] = 0$$

$$149 \quad l_{mcy} + k_m \left( \frac{[NtcA^{(a)}]^3}{\theta_3 + [NtcA^{(a)}]^3} + \frac{[NtcA^{(a)} - PipX]^3}{\theta_4 + [NtcA^{(a)} - PipX]^3} \right) - d_m[Mcy] = 0$$

$$150 \quad f_{mg} \frac{[Mcy][Glu]}{k_3 + [Glu]} - d[MC] = 0 \quad (S9.1-S9.13)$$

151 To investigate whether the toxin free equilibrium can exist for our system:

152 Let  $[MC] = 0$ ,

$$153 \quad \text{Then from (S9.13), } f_{mg} \frac{[Mcy][Glu]}{k_3 + [Glu]} = 0.$$

154  $\Rightarrow$  either,  $[Glu] = 0$  or,  $[Mcy] = 0$

155 Hence, from equation (S9.2) and (S9.12),

$$156 \quad l_{gl} + V_{GOGAT} + V_{GDH} = 0 \quad (S10.1)$$

$$157 \quad \text{or, } l_{mcy} + k_m \left( \frac{[NtcA^{(a)}]^3}{\theta_3 + [NtcA^{(a)}]^3} + \frac{[NtcA^{(a)} - PipX]^3}{\theta_4 + [NtcA^{(a)} - PipX]^3} \right) = 0 \quad (S10.2)$$

158 Both the equations S10.1 and S10.2 cannot be true for non-zero positive parameter values. Hence, it  
 159 is obvious that the toxin free equilibrium cannot exist which ensures that there can be no set of  
 160 parameter within our considered ranges which leads to complete abolishment of intracellular  
 161 microcystin levels.

162

163 To ensure positivity and existence of the interior equilibrium solutions, Latin Hypercube Sampling  
 164 (LHS) was used to generate 100000 random parameter sets within the defined ranges (Table S5)  
 165 and the model simulations of the range of  $10^6$  min were performed for each such combination. It  
 166 was observed that each model simulation led to positive interior equilibrium solution.

167 Further to check the stability of the system, the Jacobian matrix  $J$  was calculated using Symbolic  
 168 Math Toolbox in MATLAB 2012a. The sensitive parameters and other parameters considered in the  
 169 result section were largely varied, and the steady state solutions  $X^* \in \mathbb{R}_+^{13}$  for each set of  
 170 parameters were obtained from simulations.  $J^* = J|_{X^*}$  was obtained at each of these steady states and  
 171 the eigen values were calculated numerically. It was observed that the real part of all the eigen

172 values were negative thus confirming a stable steady state of the positive interior equilibrium point.  
 173 Stability regions are shown in Fig S2 for few parametric combinations.

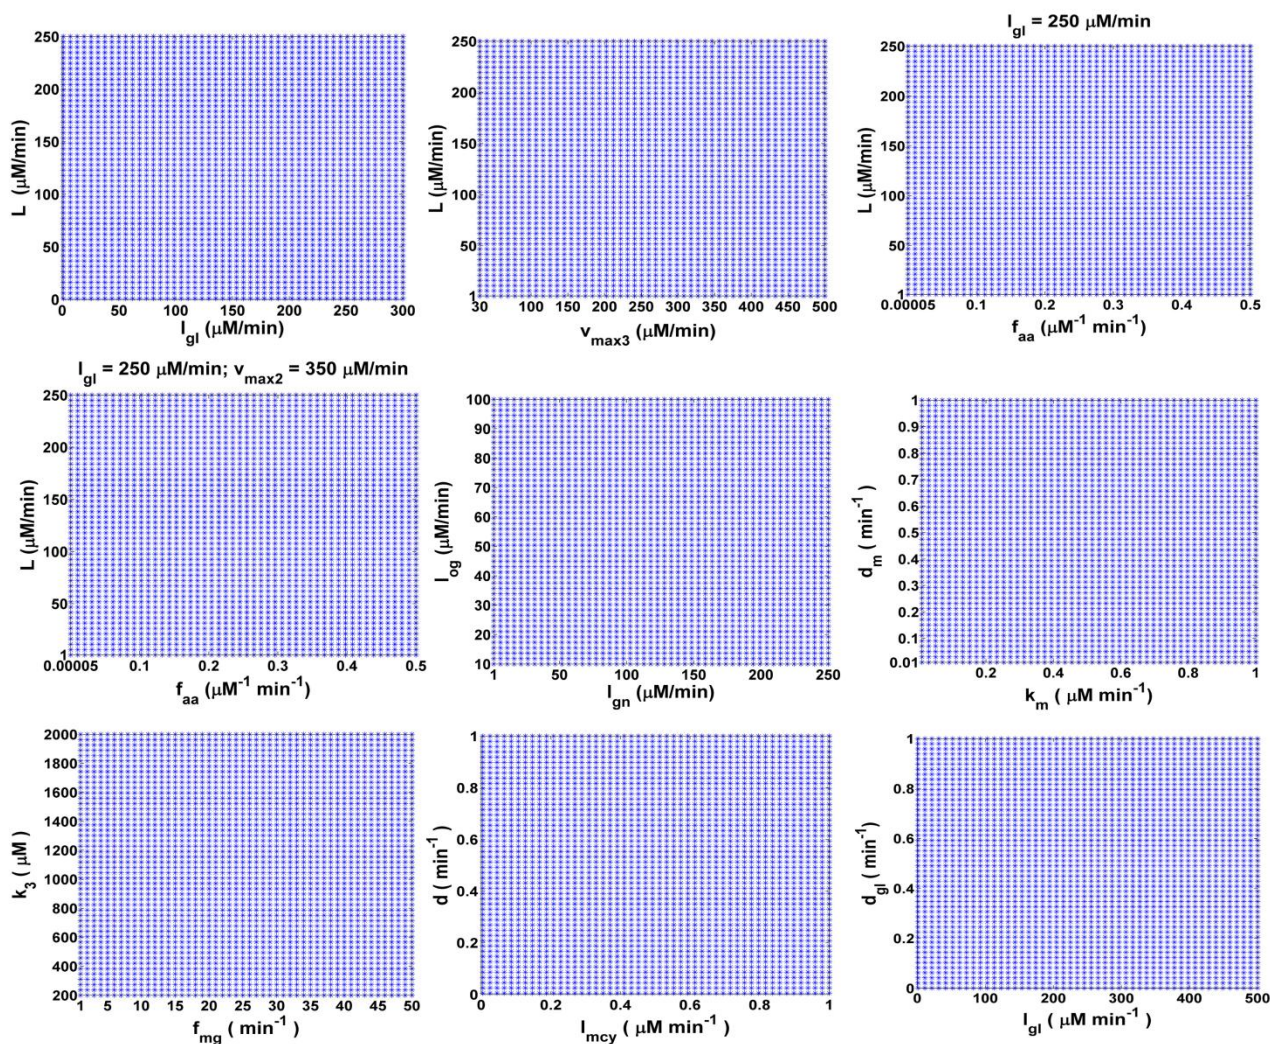

174

175 **Fig S2:** Regions of stability for different parametric combinations

## 176 S7. Global Sensitivity Analysis

177 Extend Fourier Amplitude Sensitivity Test (eFAST) was used to carry out a parameter sensitivity  
 178 analysis. The algorithm assigns each input parameter a sinusoidal function of a particular frequency  
 179 that determines the parameter value on the basis of sample number from 1 through  $N_S$ , the total  
 180 number of samples per search curve. The choice of the sinusoidal function depends on the type of  
 181 distribution specified for each parameter. In order to avoid same samples being drawn, the  
 182 algorithm is repeated  $N_R$  times, by introducing random phase shift of the sinusoidal function at each  
 183 iteration.<sup>48</sup>

184 For each of the  $i^{th}$  parameter, we calculate two sensitivity indices, *viz.*, the first order sensitivity  
 185 index,  $S_i$  and the total order sensitivity index,  $S_{Ti}$ .  $S_i$  denotes the fraction of model output variance  
 186 which can be explained by input variation of a parameter. In order to calculate  $S_{Ti}$ , the summed  
 187 sensitivity index of all the parameters except  $i$ , is calculated using their corresponding frequency.  
 188 Then,  $S_{Ti}$  is calculated as the remaining variance after the contribution of the complementary set  $S_{ci}$   
 189 is removed.

190 
$$S_{Ti} = I - S_{ci}$$

191 Parameter sensitivity analysis was carried out using the whole set of parameters [k=52] and a  
 192 dummy parameter, taking microcystin [MC] concentration at 200 and 10000 minutes, as the  
 193 response variable. 513 samples were chosen per search curve and resampling of the frequency  
 194 search curves was carried out 5 times [ $N_S=513$ ,  $N_R=5$ ]. Hence, the result is an outcome of total  $N=$   
 195  $53 \times 513 \times 5 = 135945$  model evaluations. A t-test is carried out on data generated by resampling in  
 196 order to compare the distributions of  $S_i^j$  or  $S_{Ti}^j$  [ $j=1,2,\dots,N_R$ ] with  $S_{dummy}^j$  or  $S_{Tdummy}^j$ .<sup>48</sup>

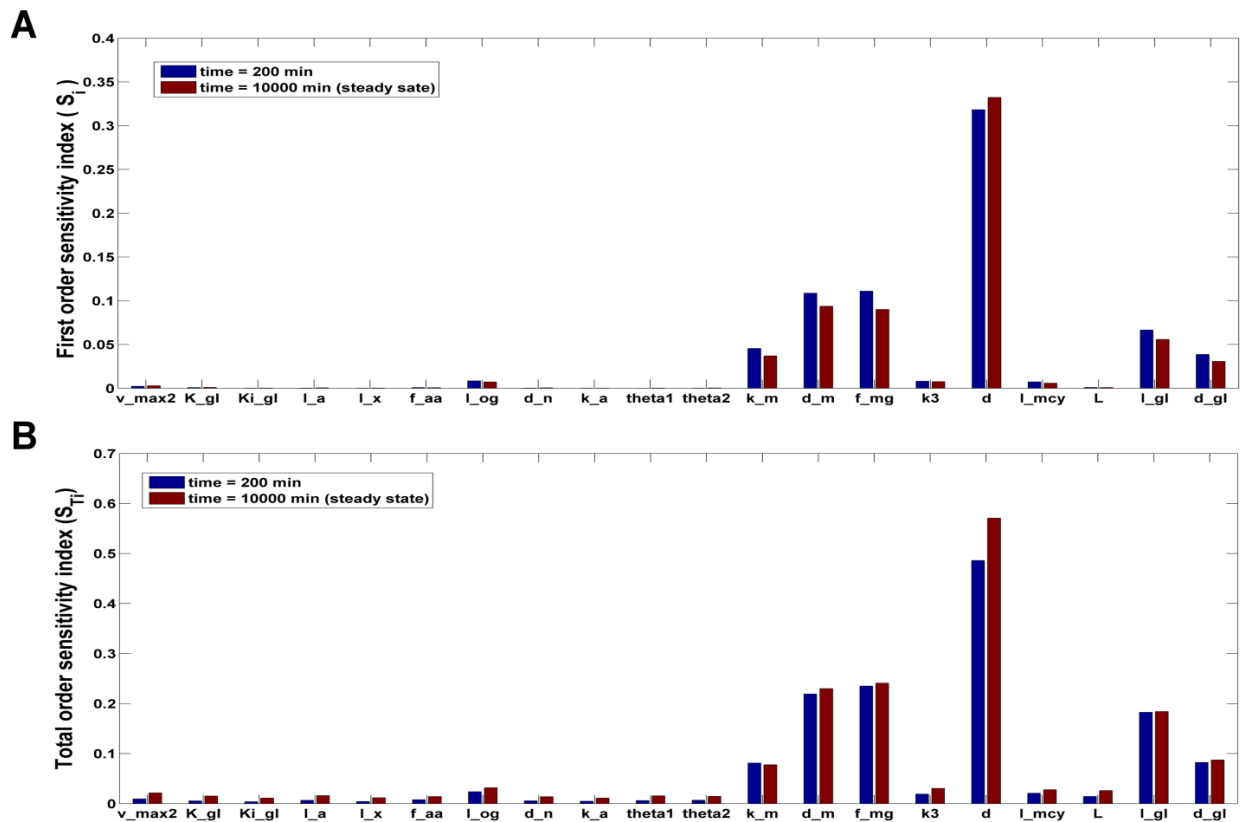

Fig. S3: First order and total order sensitivity index for significant parameters ( $p < 0.05$ )



200 **Table S5:** The sensitivity indices for different parameters with respect to microcystin concentration  
201 at 200 min and 10000 min (\* p-value < 0.01; \*\*p-value < 0.05)

| <i>Parameters</i> | <i>Range</i>  | <i>S<sub>i</sub> (200 min)</i> | <i>S<sub>i</sub> (10000 min)</i> | <i>S<sub>Ti</sub> (200 min)</i> | <i>S<sub>Ti</sub> (10000 min)</i> |
|-------------------|---------------|--------------------------------|----------------------------------|---------------------------------|-----------------------------------|
| $v_{max1}$        | [60 600]      | 0.0001                         | 0.0002                           | 0.0043                          | 0.0121                            |
| $K_{gn}$          | [30 300]      | 0.0001                         | 0.0002                           | 0.0037                          | 0.0112                            |
| $K_{2-og}$        | [5 50]        | 0.0001                         | 0.0002                           | 0.0027                          | 0.0103                            |
| $K_{i(gn)}$       | [20 200]      | 0.0001                         | 0.0002                           | 0.0041                          | 0.0127                            |
| $v_{max2}$        | [60 600]      | 0.0023**                       | 0.0029**                         | 0.0093                          | 0.0214**                          |
| $K_{nh}$          | [10 100]      | 0.0003                         | 0.0004                           | 0.0050                          | 0.0144                            |
| $K_{gl}$          | [600 6000]    | 0.0008**                       | 0.0010                           | 0.0055                          | 0.0151                            |
| $K_{i(gl)}$       | [4000 40000]  | 0.0002**                       | 0.0003                           | 0.0037                          | 0.0111                            |
| $v_{max3}$        | [30 500]      | 0.0000                         | 0.0002                           | 0.0028                          | 0.0111                            |
| $K''_{nh}$        | [700 7000]    | 0.0001                         | 0.0003                           | 0.0035                          | 0.0119                            |
| $K''_{2-og}$      | [40 400]      | 0.0001                         | 0.0002                           | 0.0050                          | 0.0130                            |
| $K''_{i(2-og)}$   | [100 1000]    | 0.0001                         | 0.0003                           | 0.0062                          | 0.0154                            |
| $f_{ax}$          | [0.02 0.2]    | 0.0001                         | 0.0002                           | 0.0036                          | 0.0121                            |
| $b_{ax}$          | [0.001 0.01]  | 0.0001                         | 0.0002                           | 0.0064                          | 0.0162                            |
| $f_{px}$          | [0.00005 0.5] | 0.0001                         | 0.0002                           | 0.0047                          | 0.0135                            |
| $l_a$             | [0.06 0.6]    | 0.0003**                       | 0.0005                           | 0.0066**                        | 0.0160                            |
| $d_a$             | [0.03 0.3]    | 0.0000                         | 0.0001                           | 0.0029                          | 0.0088                            |
| $l_p$             | [0.1 0.7]     | 0.0001                         | 0.0003                           | 0.0066                          | 0.0146                            |
| $d_p$             | [0.03 0.3]    | 0.0001                         | 0.0003                           | 0.0055                          | 0.0144                            |
| $l_x$             | [0.07 0.7]    | 0.0002**                       | 0.0003                           | 0.0043                          | 0.0118                            |
| $d_x$             | [0.015 0.15]  | 0.0001                         | 0.0003                           | 0.0036                          | 0.0116                            |
| $d_{px}$          | [0.001 0.01]  | 0.0001                         | 0.0002                           | 0.0042                          | 0.0126                            |
| $f_{aa}$          | [0.00005 0.5] | 0.0008**                       | 0.0007                           | 0.0078                          | 0.0141                            |
| $b_{aa}$          | [0.001 0.01]  | 0.0001                         | 0.0003                           | 0.0040                          | 0.0127                            |
| $d_{aa}$          | [0.03 0.3]    | 0.0003                         | 0.0006                           | 0.0071                          | 0.0152                            |
| $l_{nh}$          | [0.05 0.5]    | 0.0000                         | 0.0001                           | 0.0032                          | 0.0113                            |
| $l_{og}$          | [10 100]      | 0.0084*                        | 0.0072*                          | 0.0238**                        | 0.0318**                          |
| $d_{og}$          | [0.03 0.3]    | 0.0001                         | 0.0003                           | 0.0045                          | 0.0119                            |
| $d_n$             | [0.03 0.3]    | 0.0003**                       | 0.0006                           | 0.0056**                        | 0.0140                            |
| $b_{px}$          | [0.0005 0.05] | 0.0000                         | 0.0002                           | 0.0030                          | 0.0110                            |
| $k_4$             | [0.09 0.9]    | 0.0001                         | 0.0002                           | 0.0042                          | 0.0127                            |

|              |              |          |          |          |          |
|--------------|--------------|----------|----------|----------|----------|
| $k_a$        | [0.05 0.5]   | 0.0002** | 0.0002   | 0.0048   | 0.0110   |
| $\theta_1$   | [0.06 0.6]   | 0.0001   | 0.0003   | 0.0062** | 0.0156   |
| $\theta_2$   | [0.06 0.6]   | 0.0002   | 0.0004   | 0.0068** | 0.0144   |
| $c_{ax}$     | [5 50]       | 0.0002   | 0.0003   | 0.0050   | 0.0116   |
| $k_1$        | [4 40]       | 0.0001   | 0.0003   | 0.0051   | 0.0159   |
| $k_2$        | [4 40]       | 0.0000   | 0.0002   | 0.0032   | 0.0115   |
| $k_m$        | [0.09 0.9]   | 0.0455*  | 0.0370*  | 0.0811*  | 0.0777** |
| $\theta_3$   | [0.08 0.8]   | 0.0001   | 0.0002   | 0.0036   | 0.0115   |
| $\theta_4$   | [0.08 0.8]   | 0.0000   | 0.0002   | 0.0036   | 0.0108   |
| $d_m$        | [0.02 0.2]   | 0.1087*  | 0.0938*  | 0.2192*  | 0.2299*  |
| $f_{mg}$     | [1 20]       | 0.1109*  | 0.0900*  | 0.2350*  | 0.2409*  |
| $k_3$        | [800 1600]   | 0.0081*  | 0.0076*  | 0.0191*  | 0.0306*  |
| $d$          | [0.005 0.05] | 0.3182*  | 0.3323*  | 0.4861*  | 0.5706*  |
| $l_{mcy}$    | [0.06 0.6]   | 0.0073** | 0.0058** | 0.0207*  | 0.0279** |
| $L$          | [1 500]      | 0.0009** | 0.0009** | 0.0144   | 0.0259   |
| $d_N$        | [0.09 0.9]   | 0.0001   | 0.0002   | 0.0032   | 0.0103   |
| $d_{ax}$     | [0.002 0.02] | 0.0001   | 0.0003   | 0.0059   | 0.0138   |
| $l_{gl}$     | [1 300]      | 0.0665*  | 0.0558*  | 0.1825*  | 0.1840*  |
| $l_{gn}$     | [1 250]      | 0.0002   | 0.0003   | 0.0048   | 0.0125   |
| $d_{gl}$     | [0.003 0.3]  | 0.0387*  | 0.0307*  | 0.0824*  | 0.0873*  |
| $d_{gn}$     | [0.02 0.2]   | 0.0000   | 0.0002   | 0.0028   | 0.0113   |
| <i>dummy</i> | [1 10]       | 0.0001   | 0.0003   | 0.0043   | 0.0134   |

202

## 203 S8. Change in microcystin under varying nitrogen and glutamate conditions

204 When glutamate influx into the system is low [ $l_{gl}=24.6664 \mu M \min^{-1}$  (default estimated value)],  
205 difference between microcystin under nitrogen limitation and nitrogen sufficient conditions remain  
206 low due to limitation of substrate, thereby eliminating the effect of environmental nitrogen (Fig S4  
207 H). Low glutamate influx leads to reduced activity of GS-GOGAT thereby increasing 2-OG levels  
208 (Fig S4 E) leading to an amplified Mcy steady state value (through NtcA-2OG) of around  $6\mu M$  (Fig  
209 S4 G). Even, nitrogen limitation under this condition was unable to increase 2-OG sufficiently  
210 leading to negligible increase in Mcy concentration up to ( $6.193 \mu M$ ) (Fig S4 G). But, when  
211 glutamate influx into the system is high ( $l_{gl}=250 \mu M \min^{-1}$ ), although intracellular microcystin  
212 concentration increases ( $6386 \mu M$ ) due to increase in the substrate concentration (Fig S4 H), a  
213 higher influx into the GS-GOGAT (evident from increased glutamine concentration), leads to a  
214 greater consumption of 2-OG thus lowering Mcy levels ( $5.5 \mu M$ ) (Fig S4 E, G). Further, creating a

215 nitrogen deficient scenario under such condition, led to a further increase in Mcy concentration 6.17  
 216  $\mu\text{M}$  (Fig S4 G). The increased enzyme level combined with higher substrate glutamate leads to  
 217 even higher microcystin concentrations (7092  $\mu\text{M}$ ) (Fig S4 H).

218

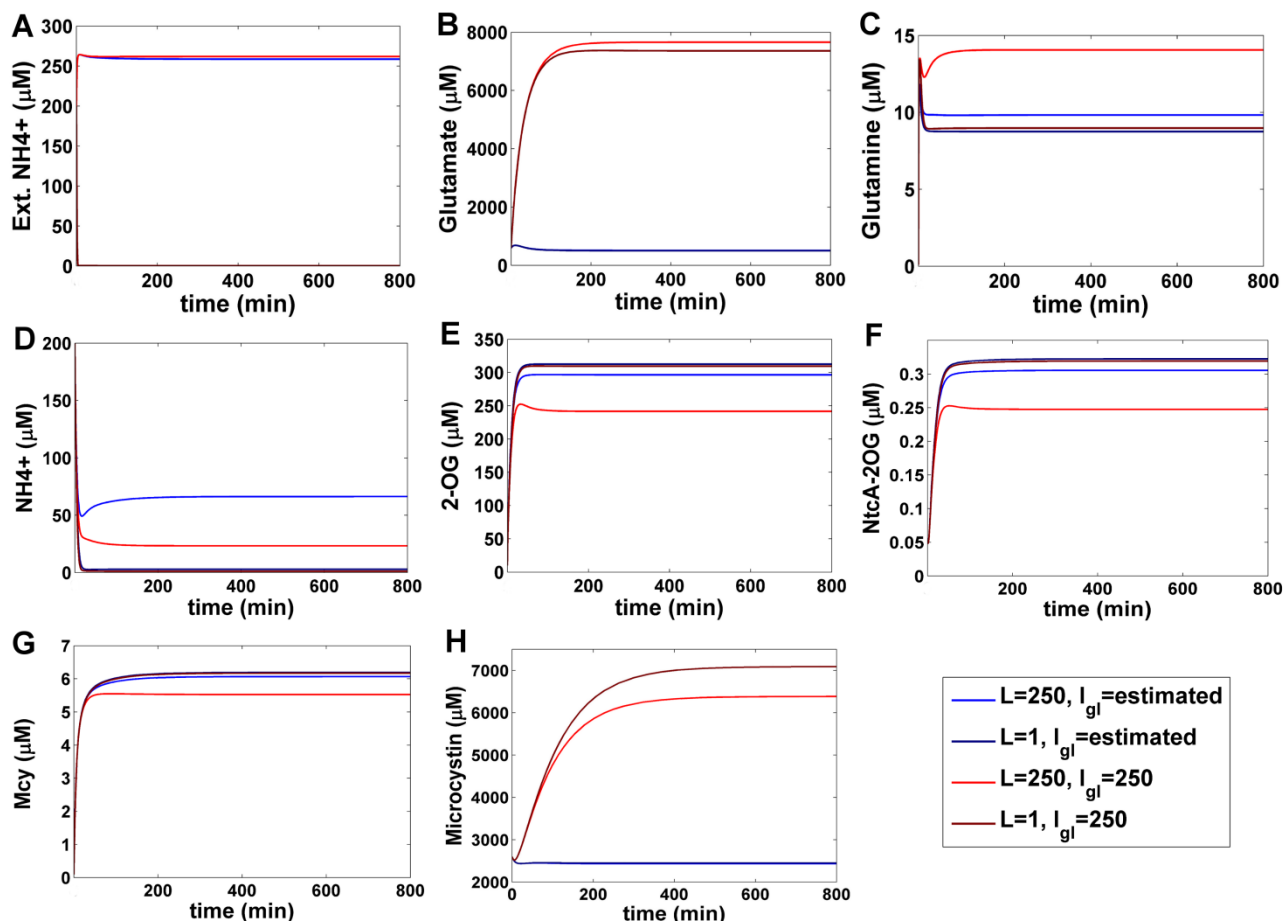

219

220 **Fig S4:** Temporal behaviour of different state variables considered in our models for different  
 221 nitrogen ( $L$ ) and glutamate influx ( $I_{gl}$ ) scenario. (In order to observe the changes in external nitrogen  
 222 and glutamine, their initial values are considered to be 200  $\mu\text{M}$  and 0.1  $\mu\text{M}$  respectively.)

### 223 S8.1 Reversal of microcystin-nitrogen relationship

224 A reversal of microcystin behaviour under nitrogen limitation was noted at increased  $v_{max3}$  when  
 225 simulations were carried out at low glutamate conditions. Under nitrogen deficient conditions  
 226 increasing  $v_{max3}$  had no effect on microcystin production (Fig S5 I). But, under sufficient nitrogen  
 227 availability, when the activity of GDH is dominating ( $v_{max3}=500 \mu\text{M min}^{-1}$ ), the glutamate produced  
 228 is directly diverted to microcystin production rather than GS-GOGAT (Fig S9 B), which is evident  
 229 from the glutamine temporal plot where no change in behaviour of glutamine is observed for

different  $v_{max3}$  (Fig S9 C). This increases the microcystin concentration leading to a relative increase of microcystin level under nitrogen excess conditions (Fig S9 I).

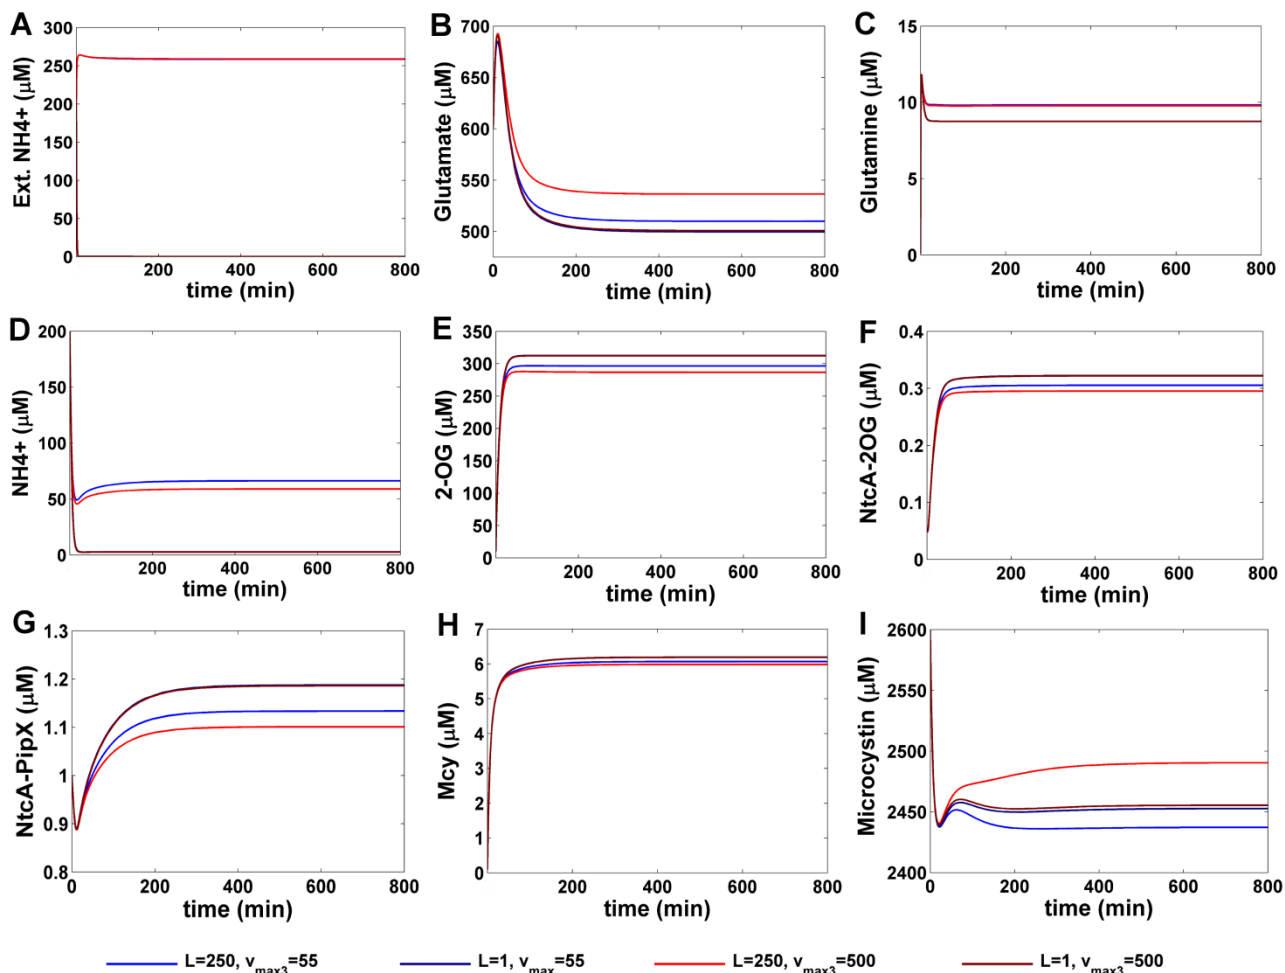

**Fig S5:** Temporal behaviour of different state variables for different GDH activity ( $v_{max3}$ ) and nitrogen condition ( $L$ ) (In order to observe the changes in external nitrogen and glutamine, their initial values are considered to be 200  $\mu\text{M}$  and 0.1  $\mu\text{M}$  respectively.)

## S9. Opposite behaviour of glutamate steady state under nitrogen deficiency

Under high influx of glutamate to the system ( $I_{gl}=250 \mu\text{M min}^{-1}$ ) when the NtcA-2OG formation rate is higher ( $f_{aa}=0.1 \mu\text{M}^{-1}\text{min}^{-1}$ ), i.e., 2-OG is preferred in the gene regulation of Mcy via NtcA-2OG complex formation rather than the GS-GOGAT (Fig S6 F and G), glutamate concentration could only accumulate upto the concentration of around 5000  $\mu\text{M}$  (Fig S6 B). This is because of the inoperable GOGAT due to 2-OG unavailability (Fig S6 E) and excess formation of Mcy which was able to divert all the glutamate into microcystin production (Fig S6 I). Hence under such condition, GS solely acts as a glutamate sink as is evident from the increased glutamine concentration (Fig S6 C). Introducing nitrogen starvation in this condition causes GS to stop, accumulating relatively higher glutamate concentration (Fig S6 B).

246 In order to support this observation,  $v_{max2}$  was increased to  $350 \mu M \min^{-1}$ . This increases glutamate  
247 leakage into GS under nitrogen sufficient condition (evident from higher level of glutamine  
248 concentration) (Fig S6 C) thus decreasing glutamate as well as microcystin levels (Fig S6 B, I). A  
249 nitrogen starvation scenario under such conditions stops this increased leakage of glutamate thus  
250 bringing about a relatively higher change in glutamate as well as microcystin concentration (See  
251 main article Fig. 4D and Fig S6 B, I). Also, increased  $v_{max2}$  under nitrogen sufficient levels ensures  
252 that the GS-GOGAT runs with a lower strength thereby leading to an extra accumulation of  
253 glutamate. Consequently, the relative difference in glutamate under the two nitrogen condition is  
254 lesser as compared to that of microcystin (See main article Fig. 4E).

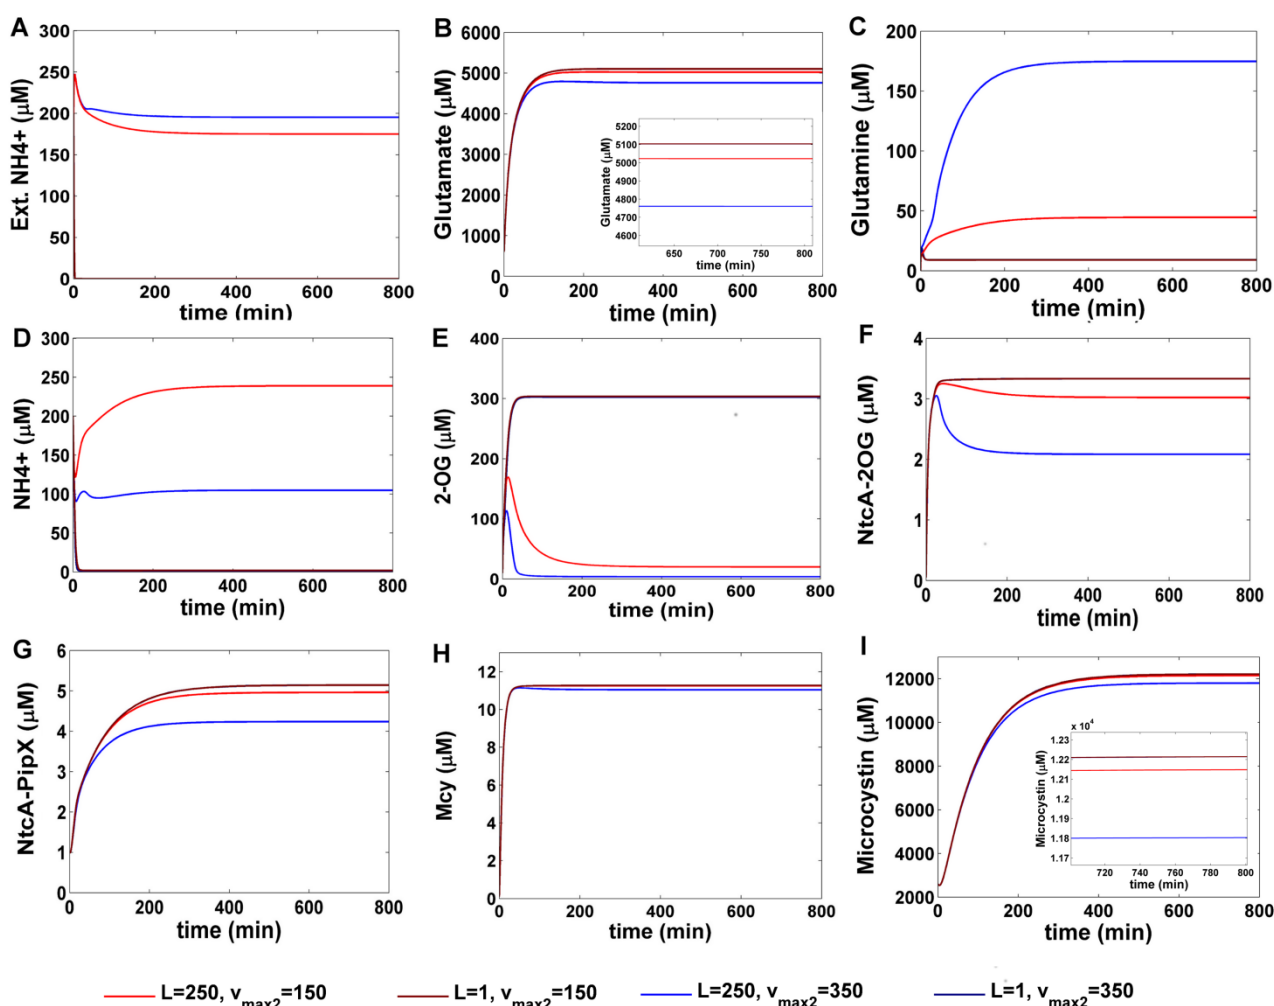

255

256 **Fig S6:** Temporal plots of different state variables for different GS activity ( $v_{max2}$ ) and nitrogen  
257 conditions ( $L$ ) when  $f_{aa} = 0.1 \mu M^{-1} \min^{-1}$  and  $l_{gl} = 250 \mu M \min^{-1}$ . (In order to observe the changes in  
258 external nitrogen and glutamine, their initial values are considered to be  $200 \mu M$  and  $0.1 \mu M$   
259 respectively.)

260

261

262 **S10. Behaviour of microcystin affected by indirect regulators**263 **S10.1 Effect of glutamine influx on steady state microcystin levels**

264 As the rate of glutamine influx into the system increases, subsequently the steady state levels of  
 265 glutamate increased due to increased activity of the GOGAT. This leads to decreased concentration  
 266 of the 2-OG (Fig S7 D) leading to subsequent decrease in Mcy concentration (Fig S7 H). For  $l_{gn}=10$   
 267  $\mu M \text{ min}^{-1}$  and  $28 \mu M \text{ min}^{-1}$ , glutamate increases initially due to GOGAT activity, but there is a  
 268 subsequent decrease in concentration signifying microcystin formation under enough availability of  
 269 Mcy enzyme (Fig S7 A). For  $l_{gn}=45 \mu M \text{ min}^{-1}$ , the transient behaviour of glutamate also changes  
 270 along with steady state levels (Fig S7 A).

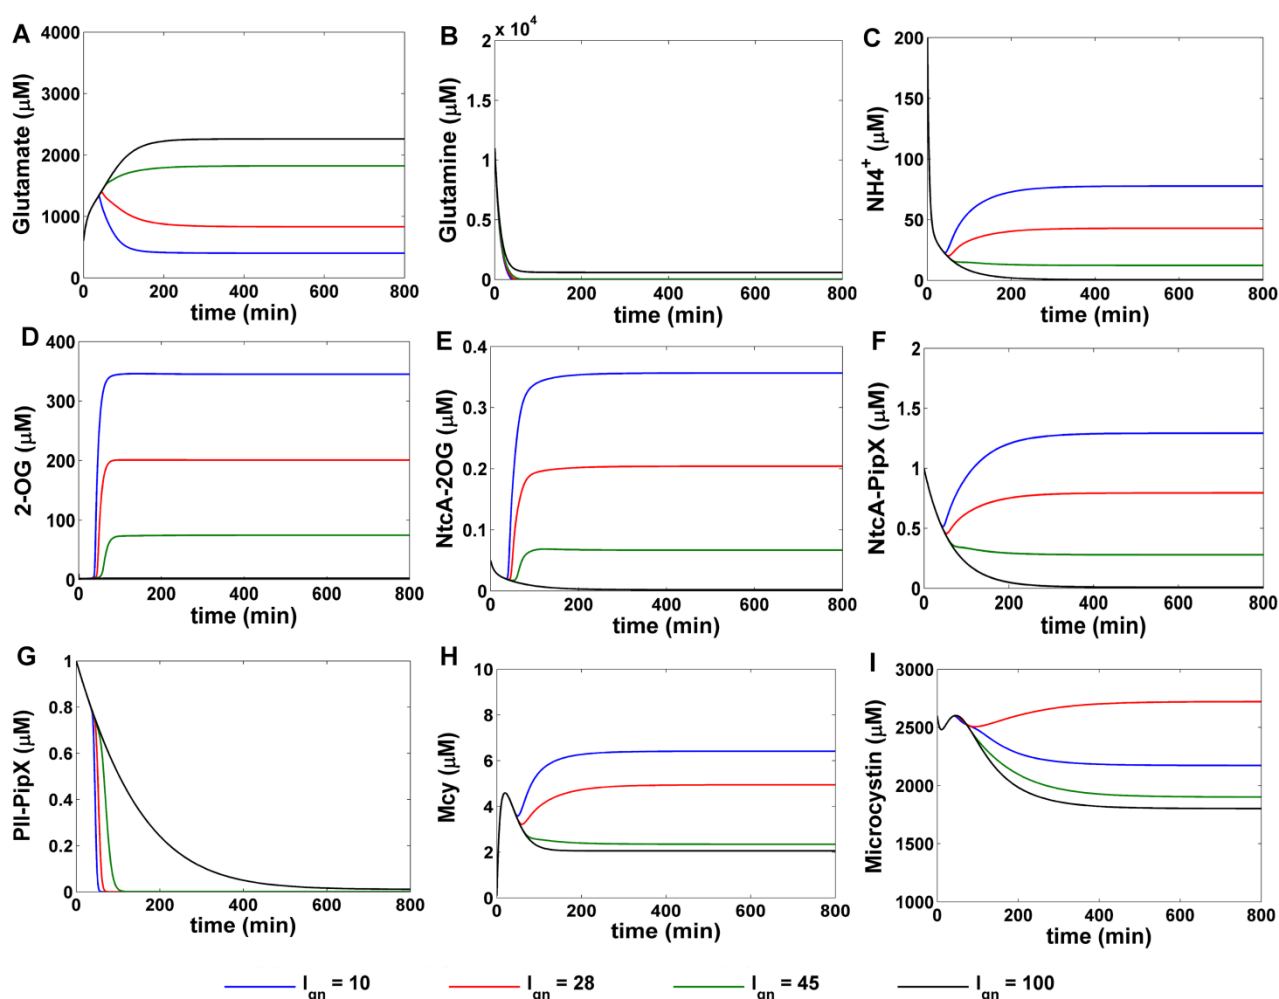

271

272 **Fig S7:** Temporal behaviour of different components for different glutamine influx ( $l_{gn}=10, 28, 45,$   
 273  $100 \mu M \text{ min}^{-1}$ ) for  $l_{og}=53 \mu M \text{ min}^{-1}$

274 Although, initially the glutamate is consumed into microcystin (up to around 40 min - 45 min),  
 275 further in time, glutamate accumulation increases as the flux of glutamine into GOGAT is very high  
 276 affecting 2-OG dependent Mcy enzyme levels (Fig S7 D, H). Microcystin reaches very low levels  
 277 as the available Mcy enzyme in comparison to substrate glutamate is sufficiently low (Fig S7 I). A  
 278 further increase in glutamine influx rates  $l_{gn}=100 \mu M \min^{-1}$  represents the increased glutamine  
 279 influx scenario where whole 2-OG was consumed in GS-GOGAT (Fig S7 D) thereby producing  
 280 lowest saturating microcystin levels (Fig S7 I).

## 281 S10.2 Transient effect of glutamine on microcystin synthetase transcription

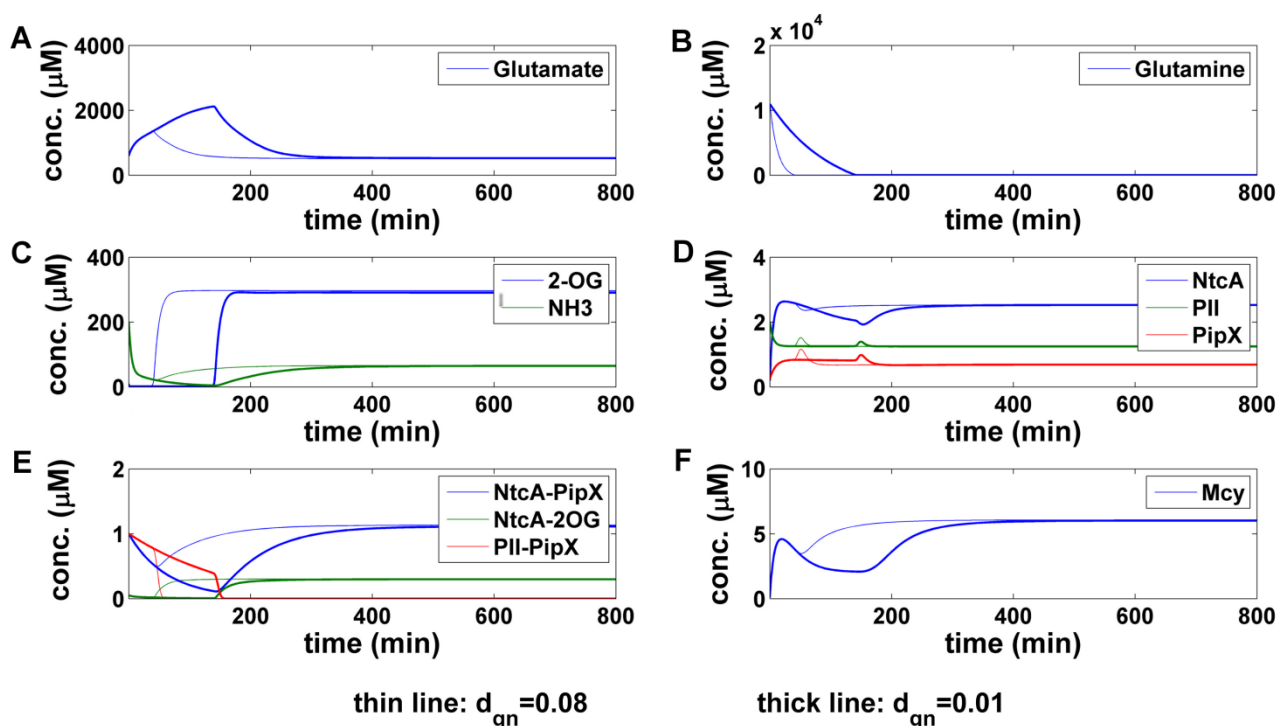

282

283 **Fig. S8:** Delayed production of Mcy with decreasing  $d_{gn}$ . The thick lines represent  $d_{gn}=0.01 \min^{-1}$   
 284 and thin lines represent  $d_{gn}=0.08 \min^{-1}$ .

285 Initially the 2-OG available is preferred towards the GS-GOGAT rather than the gene regulatory  
 286 network of microcystin. The operation of GOGAT increases glutamate until 40 min (at  $d_{gn}=0.08$   
 287  $\min^{-1}$ ) by which time glutamine concentration reaches very low value (Fig S8 A, B). This signifies  
 288 that the inflow and outflow of metabolites through GS-GOGAT cycle is nearly balanced thereby  
 289 making the 2-OG available for Mcy regulation (2-OG switch to higher concentration) (Fig S8 C).  
 290 With increasing 2-OG concentration, the NtcA-2OG concentration increases which subsequently  
 291 leads to increase in NtcA-2OG-PipX and Mcy transcription (Fig S8 E, F). In order to study the  
 292 effect of glutamine, the rate of depletion of glutamine was decreased ( $d_{gn}=0.01 \min^{-1}$ ) leading to  
 293 prolonged high activity of the GS which simultaneously enters into the GOGAT to synthesize

294 sufficient glutamate (Fig S8 A). This can be confirmed as the glutamine reaches the steady state  
 295 slower in this case and the glutamate increases initially upto 140 *min* after which it is consumed into  
 296 microcystin (Fig S8 A and B). Although the same steady state level was maintained, there is a  
 297 corresponding time delay in the 2-OG switch which delayed production of NtcA-2OG and  
 298 subsequently Mcy (Fig S8 C, F).

### 299 **S10.3 Effect of the signalling protein PII on microcystin levels**

300 Changes in the PII protein considered in our model did not show significant change in microcystin  
 301 levels. When simulated without PII protein there were only transient changes in the PipX  
 302 concentration due to removal of binding constraint provided by PII (Fig S9 A, B). Subsequent  
 303 increase in the affinity of PipX for PII ( $f_{px} = 0.0001 \mu M^{-1} min^{-1}$  and  $f_{px} = 0.1 \mu M^{-1} min^{-1}$ ) demonstrated  
 304 no distinct effect on the microcystin steady state level (Fig S9 F). But at very high sequestration of  
 305 PipX by PII ( $f_{px} = 0.5 \mu M^{-1} min^{-1}$ ) the free PipX concentration decreases (Fig S9 B) thus decreasing  
 306 the NtcA-PipX concentration (Fig S9 D). These in turn led to a decreased Mcy and hence relatively  
 307 lower microcystin levels, although the relative difference in steady state microcystin remains still  
 308 low (Fig S9 E, F).

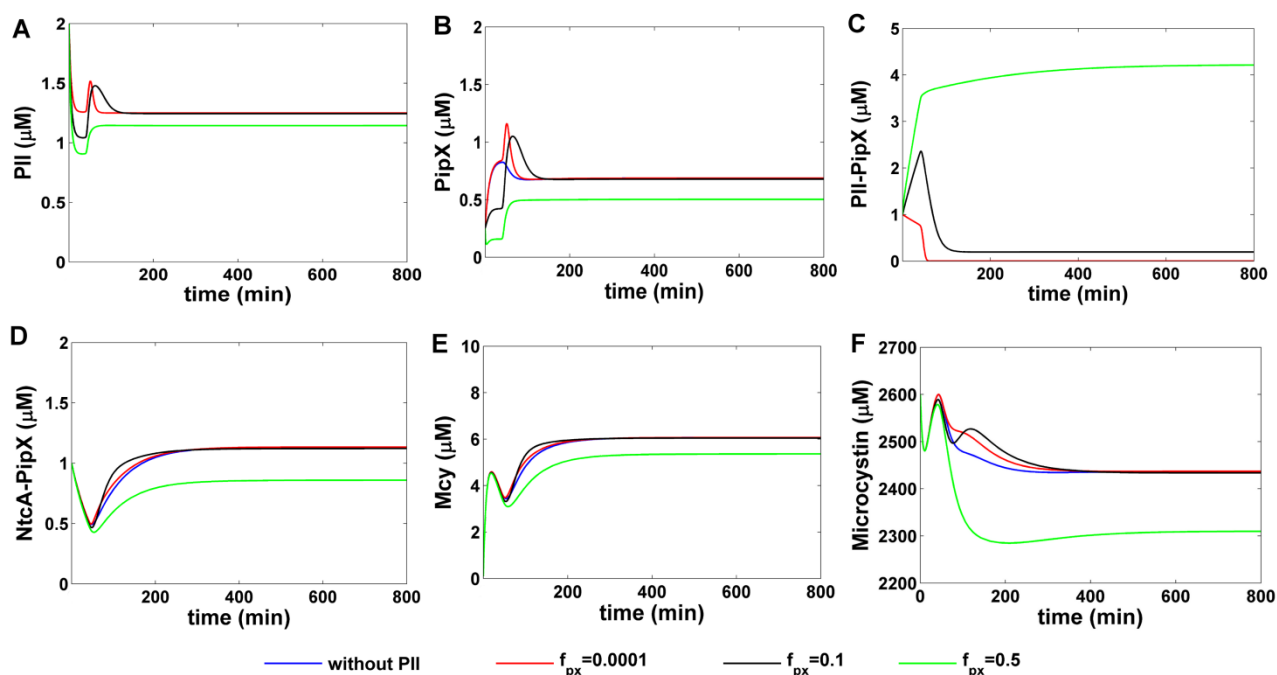

309

310 **Fig S9:** Time plots of different state variables without PII, and with PII for different  $f_{px}$

311 **References cited in this Supplementary Text are provided in the Reference list of the Main**  
 312 **Article**

313
